# Supplementary material for: Evaluation of the Sex-and-Age-Specific Effects of PM2.5 on Hospital Readmission in the Presence of the Competing Risk of Mortality in the Medicare Population of Utah 1999–2009
Source: PubMed Central journal article supplement (PMC6947183; doi:10.3390/jcm8122114), 2019-12-02
Supplement: jcm-08-02114-s001.pdf [file jcm-08-02114-s001.pdf]

| <b>Supplementary Table 1: ICD-9 Codes Included</b> |                                                                                                                                                                                                                                                                                                                                                                                                                                                                                                                                                                                                                                                                                                                                                                                                                                                                                                                                                                                                                        |
|----------------------------------------------------|------------------------------------------------------------------------------------------------------------------------------------------------------------------------------------------------------------------------------------------------------------------------------------------------------------------------------------------------------------------------------------------------------------------------------------------------------------------------------------------------------------------------------------------------------------------------------------------------------------------------------------------------------------------------------------------------------------------------------------------------------------------------------------------------------------------------------------------------------------------------------------------------------------------------------------------------------------------------------------------------------------------------|
| Any Heart Condition                                | 41000, 41001, 41002, 41010, 41011, 41012, 41020, 41021, 41022, 41031, 41032,41040, 41041, 41042, 41050, 41051, 41052, 41060, 41061, 41062, 41070 ,41071, 41072, 41080, 41081, 41082, 4109, 41090, 41091, 41092, 428,4280,4281,42820,42821,42822,42823,42830,42831,42832,42833,42840, 42841, 42842,42843, 4289, 41000, 41001, 41002, 41010, 41011, 41012, 41020, 41021, 41022, 41031, 41032,41040, 41041, 41042, 41050, 41051, 41052, 41060, 41061, 41062, 41070 ,41071, 41072, 41080, 41081, 41082, 4109, 41090, 41091, 41092, 4110,4111, 41181, 41189, 412, 4130,4131,4139,4140,41400,41401,41402,41403,41404,41405,41406,41407,41410,41411,4143,4148,4149, 4270,4271,4272,42731,42732,42741,42742,4275,42760,42761,42769,4278, 42789, 4279, 4110,4111,41181, 41189, 41511, 4150, 4151, 41519, 4260, 42610,42611,42612,42613,4263,4264,42650,42652,42653,42654,4266, 4267,42682,42689,4269, 4440,4441,44421,44422,44481,44489,4449,452,4530,4531,4532,4533, 45340,45341,45342,45351,45377,4538,45381,45382,45385,4539 |
| MI                                                 | 41000, 41001, 41002, 41010, 41011, 41012, 41020, 41021, 41022, 41031, 41032,41040, 41041, 41042, 41050, 41051, 41052, 41060, 41061, 41062, 41070 ,41071, 41072, 41080, 41081, 41082, 4109, 41090, 41091, 41092                                                                                                                                                                                                                                                                                                                                                                                                                                                                                                                                                                                                                                                                                                                                                                                                         |
| Heart Failure                                      | 428,4280,4281,42820,42821,42822,42823,42830,42831,42832,42833,42840, 42841, 42842,42843, 4289                                                                                                                                                                                                                                                                                                                                                                                                                                                                                                                                                                                                                                                                                                                                                                                                                                                                                                                          |
| Ischemic Heart Disease                             | 41000, 41001, 41002, 41010, 41011, 41012, 41020, 41021, 41022, 41031, 41032,41040, 41041, 41042, 41050, 41051, 41052, 41060, 41061, 41062, 41070 ,41071, 41072, 41080, 41081, 41082, 4109, 41090, 41091, 41092, 4110,4111, 41181, 41189, 412, 4130,4131,4139,4140,41400,41401,41402,41403,41404,41405,41406,41407,41410,41411,4143,4148,4149                                                                                                                                                                                                                                                                                                                                                                                                                                                                                                                                                                                                                                                                           |
| Cardiac Dysrhythmias/Arrhythmias                   | 4270,4271,4272,42731,42732,42741,42742,4275,42760,42761,42769,4278, 42789, 4279                                                                                                                                                                                                                                                                                                                                                                                                                                                                                                                                                                                                                                                                                                                                                                                                                                                                                                                                        |

**Tables S2-S7:** The effect of fine particulate matter (PM2.5) air pollution on 30-day cardiac readmission and death within 30-days by index admission for cardiovascular patients in Utah's Medicare population by age group (65-74, 75-84, 85+ years) and sex (male, female) 1999-2009. Results of Fine and Gray regression. All results jointly estimate the risk of readmission or mortality while adjusting for the competing risk of readmission from a non-cardiac related cause. Results show 95% confidence intervals (CI) ( $\alpha=0.05$ ) and Bonferroni corrected 98.75% CI's ( $\alpha=0.0125$ ). All models adjust for zip code level median-household income, Charlson Comorbidity Index, dual enrollment status, and daily temperature.

**Tables S8-S13:** The effect of fine particulate matter (PM2.5) air pollution on 30-day cardiac readmission within 30-days by index admission for cardiovascular patients in Utah's Medicare population b by age group (65-74, 75-84, 85+ years) and sex (male, female) 1999-2009. Results of Cox Proportional Hazards Regression. Results show 95% confidence intervals (CI) ( $\alpha=0.05$ ) and Bonferroni corrected 98.75% CI's ( $\alpha=0.0125$ ). All models adjust for zip code level median-household income, Charlson Comorbidity Index, dual enrollment status, and daily temperature.

**Table S14:** The effect of fine particulate matter (PM2.5) air pollution on 30-day cardiac readmission and death within 30-days by index admission for cardiovascular patients in Utah's Medicare population 1999-2009. Results of Fine and Gray regression. All results jointly estimate the risk of readmission or mortality while adjusting for the competing risk of readmission from a non-cardiac related cause. Results show 95% confidence intervals (CI) ( $\alpha=0.05$ ) and Bonferroni corrected 98.75% CI's ( $\alpha=0.0125$ ). All models adjust for zip code level median-household income, Charlson Comorbidity Index, dual enrollment status, and daily temperature.

**Table S2: Males Age 65-74 Years**

| Index Heart Condition                     | Hazard Ratio for<br>Readmission | 95% CI    | 98.75% CI | Pr>ChiSq | Hazard Ratio for<br>Death | 95% CI    | 98.75% CI | Pr>ChiSq |
|-------------------------------------------|---------------------------------|-----------|-----------|----------|---------------------------|-----------|-----------|----------|
| <b>Any Heart Condition</b>                |                                 |           |           |          |                           |           |           |          |
| Lag 0                                     | 1.05                            | 0.94,1.17 | 0.92,1.21 | 0.36     | 0.99                      | 0.82,1.19 | 0.78,1.26 | 0.90     |
| Lag 1                                     | 1.10                            | 0.99,1.23 | 0.97,1.26 | 0.07     | 0.96                      | 0.81,1.14 | 0.77,1.20 | 0.65     |
| 3-day average                             | 1.08                            | 0.96,1.20 | 0.91,1.18 | 0.20     | 0.90                      | 0.74,1.09 | 0.71,1.14 | 0.27     |
| 7-day average                             | 1.06                            | 0.93,1.21 | 0.87,1.18 | 0.37     | 0.86                      | 0.69,1.07 | 0.65,1.13 | 0.17     |
| <b>Ischemic Heart Disease</b>             |                                 |           |           |          |                           |           |           |          |
| Lag 0                                     | 1.04                            | 0.92,1.18 | 0.89,1.22 | 0.52     | 1.05                      | 0.76,1.44 | 0.70,1.57 | 0.79     |
| Lag 1                                     | 1.04                            | 0.90,1.19 | 0.87,1.23 | 0.62     | 1.06                      | 0.85,1.32 | 0.80,1.40 | 0.62     |
| 3-day average                             | 1.03                            | 0.90,1.19 | 0.86,1.23 | 0.67     | 0.94                      | 0.71,1.25 | 0.66,1.35 | 0.68     |
| 7-day average                             | 1.02                            | 0.86,1.21 | 0.82,1.27 | 0.79     | 0.90                      | 0.67,1.22 | 0.62,1.32 | 0.50     |
| <b>Myocardial Infarction</b>              |                                 |           |           |          |                           |           |           |          |
| Lag 0                                     | 0.97                            | 0.75,1.24 | 0.70,1.33 | 0.79     | 0.77                      | 0.54,1.11 | 0.49,1.22 | 0.16     |
| Lag 1                                     | 1.09                            | 0.89,1.33 | 0.84,1.41 | 0.40     | 0.80                      | 0.56,1.14 | 0.51,1.26 | 0.22     |
| 3-day average                             | 1.09                            | 0.88,1.35 | 0.83,1.43 | 0.45     | 0.65                      | 0.43,0.97 | 0.38,1.09 | 0.04     |
| 7-day average                             | 1.11                            | 0.86,1.43 | 0.80,1.54 | 0.43     | 0.77                      | 0.50,1.19 | 0.45,1.33 | 0.24     |
| <b>Heart Failure</b>                      |                                 |           |           |          |                           |           |           |          |
| Lag 0                                     | 1.26                            | 1.09,1.46 | 1.05,1.52 | <0.01    | 0.98                      | 0.78,1.23 | 0.74,1.31 | 0.88     |
| Lag 1                                     | 1.38                            | 1.19,1.59 | 1.15,1.66 | <0.001   | 0.99                      | 0.75,1.31 | 0.70,1.41 | 0.94     |
| 3-day average                             | 1.30                            | 1.08,1.56 | 1.03,1.65 | 0.01     | 0.93                      | 0.70,1.24 | 0.65,1.34 | 0.63     |
| 7-day average                             | 1.23                            | 0.98,1.55 | 0.92,1.65 | 0.08     | 0.92                      | 0.65,1.30 | 0.59,1.42 | 0.62     |
| <b>Cardiac Dysrhythmia and Arrhythmia</b> |                                 |           |           |          |                           |           |           |          |
| Lag 0                                     | 0.85                            | 0.53,1.37 | 0.47,1.56 | 0.51     | 0.51                      | 0.24,1.08 | 0.20,1.32 | 0.08     |
| Lag 1                                     | 1.07                            | 0.82,1.40 | 0.76,1.50 | 0.63     | 0.31                      | 0.12,0.77 | 0.10,0.98 | 0.01     |
| 3-day average                             | 0.95                            | 0.68,1.33 | 0.62,1.46 | 0.79     | 0.48                      | 0.20,1.18 | 0.16,1.50 | 0.11     |
| 7-day average                             | 1.01                            | 0.71,1.43 | 0.65,1.57 | 0.97     | 0.46                      | 0.16,1.34 | 0.12,1.80 | 0.16     |

**Table S3: Males Age 75-84 Years**

| Index Heart Condition                     | Hazard Ratio for<br>Readmission | 95% CI    | 98.75% CI | Pr>ChiSq | Hazard Ratio for<br>Death | 95% CI    | 98.75% CI | Pr>ChiSq |
|-------------------------------------------|---------------------------------|-----------|-----------|----------|---------------------------|-----------|-----------|----------|
| <b>Any Heart Condition</b>                |                                 |           |           |          |                           |           |           |          |
| Lag 0                                     | 1.04                            | 0.94,1.15 | 0.92,1.18 | 0.41     | 1.10                      | 1.00,1.21 | 0.97,1.25 | 0.06     |
| Lag 1                                     | 1.04                            | 0.94,1.16 | 0.91,1.19 | 0.42     | 1.07                      | 0.97,1.19 | 0.94,1.22 | 0.18     |
| 3-day average                             | 1.04                            | 0.94,1.15 | 0.91,1.25 | 0.49     | 1.05                      | 0.95,1.17 | 0.92,1.21 | 0.33     |
| 7-day average                             | 1.02                            | 0.90,1.14 | 0.91,1.30 | 0.80     | 1.12                      | 1.00,1.25 | 0.96,1.29 | 0.06     |
| <b>Ischemic Heart Disease</b>             |                                 |           |           |          |                           |           |           |          |
| Lag 0                                     | 1.05                            | 0.90,1.23 | 0.86,1.28 | 0.56     | 1.11                      | 0.95,1.29 | 0.91,1.35 | 0.21     |
| Lag 1                                     | 1.06                            | 0.92,1.22 | 0.88,1.27 | 0.42     | 1.08                      | 0.90,1.28 | 0.86,1.35 | 0.42     |
| 3-day average                             | 1.05                            | 0.90,1.22 | 0.86,1.28 | 0.54     | 1.06                      | 0.88,1.27 | 0.84,1.34 | 0.56     |
| 7-day average                             | 1.05                            | 0.89,1.24 | 0.86,1.30 | 0.54     | 1.20                      | 0.99,1.45 | 0.93,1.53 | 0.07     |
| <b>Myocardial Infarction</b>              |                                 |           |           |          |                           |           |           |          |
| Lag 0                                     | 1.04                            | 0.81,1.34 | 0.76,1.44 | 0.74     | 1.09                      | 0.90,1.33 | 0.85,1.41 | 0.37     |
| Lag 1                                     | 1.01                            | 0.80,1.27 | 0.75,1.35 | 0.95     | 1.01                      | 0.82,1.26 | 0.77,1.33 | 0.91     |
| 3-day average                             | 1.06                            | 0.84,1.33 | 0.78,1.42 | 0.65     | 1.04                      | 0.84,1.30 | 0.79,1.38 | 0.70     |
| 7-day average                             | 1.06                            | 0.83,1.36 | 0.77,1.45 | 0.66     | 1.22                      | 0.99,1.50 | 0.93,1.59 | 0.07     |
| <b>Heart Failure</b>                      |                                 |           |           |          |                           |           |           |          |
| Lag 0                                     | 1.10                            | 0.96,1.25 | 0.93,1.29 | 0.17     | 1.15                      | 0.99,1.33 | 0.95,1.39 | 0.08     |
| Lag 1                                     | 1.06                            | 0.91,1.23 | 0.87,1.28 | 0.45     | 1.16                      | 1.01,1.32 | 0.98,1.37 | 0.03     |
| 3-day average                             | 1.07                            | 0.93,1.23 | 0.90,1.28 | 0.31     | 1.14                      | 0.99,1.32 | 0.95,1.38 | 0.08     |
| 7-day average                             | 1.04                            | 0.88,1.22 | 0.85,1.27 | 0.66     | 1.16                      | 0.99,1.35 | 0.95,1.41 | 0.07     |
| <b>Cardiac Dysrhythmia and Arrhythmia</b> |                                 |           |           |          |                           |           |           |          |
| Lag 0                                     | 0.97                            | 0.74,1.29 | 0.68,1.39 | 0.85     | 0.99                      | 0.78,1.25 | 0.73,1.33 | 0.91     |
| Lag 1                                     | 0.95                            | 0.72,1.25 | 0.67,1.35 | 0.72     | 0.70                      | 0.46,1.07 | 0.41,1.20 | 0.10     |
| 3-day average                             | 0.95                            | 0.71,1.26 | 0.66,1.37 | 0.72     | 0.77                      | 0.55,1.07 | 0.51,1.17 | 0.12     |
| 7-day average                             | 0.90                            | 0.61,1.33 | 0.55,1.48 | 0.59     | 0.87                      | 0.57,1.32 | 0.51,1.48 | 0.52     |

**Table S4: Males Age 85+ Years**

| Index Heart Condition                     | Hazard Ratio for<br>Readmission | 95% CI    | 98.75% CI | Pr>ChiSq | Hazard Ratio for<br>Death | 95% CI    | 98.75% CI | Pr>ChiSq |
|-------------------------------------------|---------------------------------|-----------|-----------|----------|---------------------------|-----------|-----------|----------|
| <b>Any Heart Condition</b>                |                                 |           |           |          |                           |           |           |          |
| Lag 0                                     | 0.98                            | 0.86,1.13 | 0.82,1.17 | 0.79     | 1.05                      | 0.94,1.18 | 0.91,1.22 | 0.39     |
| Lag 1                                     | 1.06                            | 0.94,1.20 | 0.91,1.24 | 0.32     | 1.10                      | 0.99,1.23 | 0.96,1.26 | 0.09     |
| 3-day average                             | 1.06                            | 0.94,1.21 | 0.87,1.19 | 0.34     | 1.10                      | 0.99,1.23 | 0.96,1.26 | 0.09     |
| 7-day average                             | 1.09                            | 0.95,1.25 | 0.83,1.22 | 0.24     | 1.07                      | 0.93,1.22 | 0.90,1.27 | 0.36     |
| <b>Ischemic Heart Disease</b>             |                                 |           |           |          |                           |           |           |          |
| Lag 0                                     | 1.06                            | 0.87,1.30 | 0.82,1.38 | 0.56     | 1.11                      | 0.91,1.35 | 0.86,1.42 | 0.32     |
| Lag 1                                     | 1.04                            | 0.85,1.27 | 0.81,1.34 | 0.69     | 1.05                      | 0.84,1.31 | 0.79,1.39 | 0.68     |
| 3-day average                             | 1.17                            | 0.97,1.42 | 0.92,1.49 | 0.11     | 1.11                      | 0.89,1.40 | 0.83,1.48 | 0.35     |
| 7-day average                             | 1.22                            | 0.99,1.49 | 0.94,1.57 | 0.06     | 1.08                      | 0.83,1.42 | 0.77,1.53 | 0.56     |
| <b>Myocardial Infarction</b>              |                                 |           |           |          |                           |           |           |          |
| Lag 0                                     | 1.07                            | 0.78,1.45 | 0.72,1.58 | 0.68     | 1.04                      | 0.82,1.32 | 0.77,1.41 | 0.75     |
| Lag 1                                     | 0.99                            | 0.70,1.40 | 0.64,1.54 | 0.95     | 0.95                      | 0.73,1.23 | 0.68,1.33 | 0.69     |
| 3-day average                             | 1.19                            | 0.89,1.59 | 0.82,1.72 | 0.25     | 1.04                      | 0.81,1.33 | 0.75,1.43 | 0.77     |
| 7-day average                             | 1.18                            | 0.85,1.65 | 0.77,1.81 | 0.33     | 1.05                      | 0.79,1.38 | 0.73,1.49 | 0.75     |
| <b>Heart Failure</b>                      |                                 |           |           |          |                           |           |           |          |
| Lag 0                                     | 0.93                            | 0.76,1.14 | 0.71,1.21 | 0.49     | 0.96                      | 0.80,1.15 | 0.76,1.21 | 0.66     |
| Lag 1                                     | 1.09                            | 0.91,1.29 | 0.87,1.35 | 0.35     | 1.08                      | 0.94,1.25 | 0.90,1.30 | 0.28     |
| 3-day average                             | 0.98                            | 0.80,1.20 | 0.75,1.27 | 0.83     | 1.03                      | 0.89,1.20 | 0.85,1.25 | 0.67     |
| 7-day average                             | 0.95                            | 0.74,1.21 | 0.69,1.29 | 0.65     | 0.99                      | 0.82,1.20 | 0.78,1.26 | 0.94     |
| <b>Cardiac Dysrhythmia and Arrhythmia</b> |                                 |           |           |          |                           |           |           |          |
| Lag 0                                     | 0.79                            | 0.50,1.24 | 0.44,1.41 | 0.30     | 1.19                      | 0.88,1.62 | 0.81,1.76 | 0.25     |
| Lag 1                                     | 1.03                            | 0.77,1.37 | 0.71,1.48 | 0.86     | 1.08                      | 0.80,1.47 | 0.74,1.59 | 0.60     |
| 3-day average                             | 0.99                            | 0.72,1.38 | 0.66,1.51 | 0.97     | 1.23                      | 0.92,1.66 | 0.84,1.81 | 0.17     |
| 7-day average                             | 1.09                            | 0.81,1.47 | 0.74,1.60 | 0.57     | 1.24                      | 0.82,1.87 | 0.73,2.09 | 0.31     |

**Table S5: Females Age 65-74 Years**

| Index Heart Condition                     | Hazard Ratio for<br>Readmission | 95% CI    | 98.75% CI | Pr>ChiSq | Hazard Ratio for<br>Death | 95% CI    | 98.75% CI | Pr>ChiSq |
|-------------------------------------------|---------------------------------|-----------|-----------|----------|---------------------------|-----------|-----------|----------|
| <b>Any Heart Condition</b>                |                                 |           |           |          |                           |           |           |          |
| Lag 0                                     | 1.04                            | 0.92,1.18 | 0.89,1.22 | 0.54     | 1.00                      | 0.85,1.18 | 0.81,1.24 | 0.96     |
| Lag 1                                     | 1.03                            | 0.91,1.15 | 0.88,1.19 | 0.67     | 1.01                      | 0.85,1.20 | 0.81,1.26 | 0.92     |
| 3-day average                             | 1.02                            | 0.90,1.15 | 0.81,1.12 | 0.76     | 1.00                      | 0.84,1.19 | 0.80,1.25 | 0.99     |
| 7-day average                             | 1.01                            | 0.86,1.17 | 0.86,1.19 | 0.94     | 0.93                      | 0.74,1.15 | 0.70,1.22 | 0.49     |
| <b>Ischemic Heart Disease</b>             |                                 |           |           |          |                           |           |           |          |
| Lag 0                                     | 1.01                            | 0.80,1.28 | 0.75,1.36 | 0.92     | 0.67                      | 0.28,1.60 | 0.22,2.03 | 0.36     |
| Lag 1                                     | 1.03                            | 0.83,1.28 | 0.78,1.36 | 0.80     | 0.70                      | 0.33,1.47 | 0.27,1.81 | 0.34     |
| 3-day average                             | 1.04                            | 0.84,1.29 | 0.80,1.37 | 0.69     | 0.84                      | 0.50,1.40 | 0.44,1.61 | 0.50     |
| 7-day average                             | 1.09                            | 0.86,1.37 | 0.81,1.46 | 0.47     | 0.64                      | 0.29,1.39 | 0.24,1.72 | 0.26     |
| <b>Myocardial Infarction</b>              |                                 |           |           |          |                           |           |           |          |
| Lag 0                                     | 0.92                            | 0.63,1.35 | 0.57,1.50 | 0.67     | 0.24                      | 0.03,1.88 | 0.02,3.31 | 0.17     |
| Lag 1                                     | 0.78                            | 0.52,1.17 | 0.46,1.31 | 0.23     | 0.39                      | 0.10,1.57 | 0.07,2.30 | 0.19     |
| 3-day average                             | 1.07                            | 0.82,1.40 | 0.76,1.5  | 0.61     | 0.84                      | 0.44,1.59 | 0.37,1.90 | 0.59     |
| 7-day average                             | 1.23                            | 0.95,1.61 | 0.88,1.73 | 0.12     | 0.53                      | 0.13,2.13 | 0.09,3.13 | 0.37     |
| <b>Heart Failure</b>                      |                                 |           |           |          |                           |           |           |          |
| Lag 0                                     | 0.91                            | 0.70,1.2  | 0.65,1.29 | 0.52     | 1.04                      | 0.88,1.25 | 0.83,1.31 | 0.63     |
| Lag 1                                     | 1.01                            | 0.84,1.21 | 0.79,1.27 | 0.95     | 1.05                      | 0.86,1.28 | 0.81,1.36 | 0.65     |
| 3-day average                             | 0.95                            | 0.77,1.19 | 0.72,1.26 | 0.67     | 1.05                      | 0.85,1.29 | 0.81,1.36 | 0.66     |
| 7-day average                             | 0.95                            | 0.73,1.23 | 0.68,1.31 | 0.68     | 1.00                      | 0.79,1.28 | 0.73,1.37 | 0.97     |
| <b>Cardiac Dysrhythmia and Arrhythmia</b> |                                 |           |           |          |                           |           |           |          |
| Lag 0                                     | 1.17                            | 0.96,1.43 | 0.91,1.51 | 0.11     | 0.97                      | 0.60,1.59 | 0.52,1.82 | 0.92     |
| Lag 1                                     | 1.04                            | 0.84,1.30 | 0.79,1.38 | 0.71     | 0.90                      | 0.59,1.39 | 0.52,1.57 | 0.64     |
| 3-day average                             | 1.03                            | 0.80,1.33 | 0.74,1.42 | 0.83     | 0.92                      | 0.61,1.39 | 0.55,1.56 | 0.70     |
| 7-day average                             | 0.92                            | 0.67,1.25 | 0.62,1.36 | 0.58     | 0.75                      | 0.43,1.33 | 0.36,1.56 | 0.33     |

**Table S6: Females Age 75-84 Years**

| Index Heart Condition                     | Hazard Ratio for Readmission | 95% CI    | 98.75% CI | Pr>ChiSq | Hazard Ratio for Death | 95% CI    | 98.75% CI | Pr>ChiSq |
|-------------------------------------------|------------------------------|-----------|-----------|----------|------------------------|-----------|-----------|----------|
| <b>Any Heart Condition</b>                |                              |           |           |          |                        |           |           |          |
| Lag 0                                     | 0.92                         | 0.80,1.05 | 0.77,1.09 | 0.21     | 1.12                   | 0.99,1.28 | 0.95,1.33 | 0.08     |
| Lag 1                                     | 1.02                         | 0.91,1.15 | 0.83,1.30 | 0.70     | 1.08                   | 0.95,1.24 | 0.91,1.29 | 0.25     |
| 3-day average                             | 0.95                         | 0.84,1.08 | 0.77,1.31 | 0.47     | 1.10                   | 0.95,1.27 | 0.91,1.32 | 0.21     |
| 7-day average                             | 1.01                         | 0.89,1.15 | 0.69,1.31 | 0.86     | 1.10                   | 0.94,1.30 | 0.89,1.36 | 0.24     |
| <b>Ischemic Heart Disease</b>             |                              |           |           |          |                        |           |           |          |
| Lag 0                                     | 0.78                         | 0.61,1.01 | 0.57,1.08 | 0.05     | 1.36                   | 1.12,1.65 | 1.07,1.74 | <0.01    |
| Lag 1                                     | 0.75                         | 0.59,0.96 | 0.55,1.02 | 0.02     | 1.35                   | 1.05,1.73 | 0.98,1.86 | 0.02     |
| 3-day average                             | 0.75                         | 0.60,0.94 | 0.56,1.00 | 0.01     | 1.36                   | 1.08,1.71 | 1.01,1.83 | 0.01     |
| 7-day average                             | 0.88                         | 0.69,1.12 | 0.65,1.19 | 0.30     | 1.35                   | 1.03,1.78 | 0.95,1.92 | 0.03     |
| <b>Myocardial Infarction</b>              |                              |           |           |          |                        |           |           |          |
| Lag 0                                     | 0.71                         | 0.49,1.04 | 0.44,1.15 | 0.08     | 1.35                   | 1.06,1.74 | 0.99,1.86 | 0.02     |
| Lag 1                                     | 0.69                         | 0.47,1.01 | 0.42,1.12 | 0.05     | 1.35                   | 1.02,1.78 | 0.95,1.93 | 0.03     |
| 3-day average                             | 0.66                         | 0.46,0.95 | 0.41,1.05 | 0.03     | 0.84                   | 0.44,1.59 | 0.97,1.89 | 0.02     |
| 7-day average                             | 0.64                         | 0.44,0.92 | 0.40,1.02 | 0.02     | 1.31                   | 0.94,1.81 | 0.86,1.98 | 0.11     |
| <b>Heart Failure</b>                      |                              |           |           |          |                        |           |           |          |
| Lag 0                                     | 1.14                         | 0.97,1.34 | 0.92,1.40 | 0.12     | 1.08                   | 0.87,1.33 | 0.83,1.41 | 0.47     |
| Lag 1                                     | 1.32                         | 1.15,1.52 | 1.11,1.58 | <0.001   | 1.07                   | 0.89,1.29 | 0.85,1.36 | 0.45     |
| 3-day average                             | 1.22                         | 1.06,1.40 | 1.02,1.46 | 0.01     | 1.09                   | 0.88,1.34 | 0.84,1.42 | 0.42     |
| 7-day average                             | 1.24                         | 1.06,1.46 | 1.01,1.53 | 0.01     | 1.10                   | 0.87,1.38 | 0.82,1.48 | 0.43     |
| <b>Cardiac Dysrhythmia and Arrhythmia</b> |                              |           |           |          |                        |           |           |          |
| Lag 0                                     | 0.61                         | 0.42,0.91 | 0.38,1.01 | 0.01     | 1.08                   | 0.78,1.49 | 0.72,1.62 | 0.65     |
| Lag 1                                     | 0.77                         | 0.52,1.12 | 0.47,1.24 | 0.17     | 0.79                   | 0.54,1.16 | 0.49,1.29 | 0.23     |
| 3-day average                             | 0.65                         | 0.42,0.99 | 0.38,1.11 | 0.04     | 0.82                   | 0.53,1.27 | 0.47,1.44 | 0.38     |
| 7-day average                             | 0.73                         | 0.50,1.07 | 0.45,1.18 | 0.10     | 0.97                   | 0.58,1.62 | 0.51,1.87 | 0.92     |

**Table S7: Females Age 85+ Years**

| Index Heart Condition                     | Hazard Ratio for Readmission |           |           |          | Hazard Ratio for Death |           |           |          |
|-------------------------------------------|------------------------------|-----------|-----------|----------|------------------------|-----------|-----------|----------|
|                                           |                              | 95% CI    | 98.75% CI | Pr>ChiSq |                        | 95% CI    | 98.75% CI | Pr>ChiSq |
| <b>Any Heart Condition</b>                |                              |           |           |          |                        |           |           |          |
| Lag 0                                     | 1.04                         | 0.87,1.24 | 0.83,1.30 | 0.66     | 1.00                   | 0.89,1.12 | 0.86,1.15 | 0.98     |
| Lag 1                                     | 1.04                         | 0.87,1.24 | 0.93,1.24 | 0.69     | 1.06                   | 0.95,1.17 | 0.92,1.21 | 0.31     |
| 3-day average                             | 1.01                         | 0.82,1.23 | 0.90,1.26 | 0.96     | 1.00                   | 0.89,1.12 | 0.86,1.16 | 1.00     |
| 7-day average                             | 0.95                         | 0.73,1.22 | 0.70,1.33 | 0.67     | 1.00                   | 0.87,1.13 | 0.84,1.17 | 0.94     |
| <b>Ischemic Heart Disease</b>             |                              |           |           |          |                        |           |           |          |
| Lag 0                                     | 1.16                         | 0.95,1.43 | 0.90,1.51 | 0.15     | 0.83                   | 0.63,1.09 | 0.58,1.17 | 0.17     |
| Lag 1                                     | 1.18                         | 0.97,1.44 | 0.92,1.52 | 0.10     | 0.89                   | 0.72,1.10 | 0.68,1.16 | 0.27     |
| 3-day average                             | 1.15                         | 0.90,1.47 | 0.84,1.57 | 0.27     | 0.84                   | 0.65,1.08 | 0.61,1.15 | 0.16     |
| 7-day average                             | 1.13                         | 0.85,1.49 | 0.79,1.61 | 0.40     | 0.92                   | 0.71,1.21 | 0.66,1.30 | 0.56     |
| <b>Myocardial Infarction</b>              |                              |           |           |          |                        |           |           |          |
| Lag 0                                     | 1.08                         | 0.83,1.41 | 0.77,1.52 | 0.56     | 0.83                   | 0.63,1.09 | 0.58,1.18 | 0.18     |
| Lag 1                                     | 1.10                         | 0.84,1.44 | 0.78,1.55 | 0.50     | 0.87                   | 0.69,1.10 | 0.65,1.17 | 0.25     |
| 3-day average                             | 1.07                         | 0.79,1.43 | 0.73,1.55 | 0.67     | 0.85                   | 0.66,1.10 | 0.61,1.19 | 0.23     |
| 7-day average                             | 1.03                         | 0.73,1.44 | 0.67,1.58 | 0.88     | 0.94                   | 0.71,1.24 | 0.65,1.34 | 0.65     |
| <b>Heart Failure</b>                      |                              |           |           |          |                        |           |           |          |
| Lag 0                                     | 1.07                         | 0.89,1.30 | 0.84,1.37 | 0.47     | 1.09                   | 0.96,1.23 | 0.93,1.27 | 0.17     |
| Lag 1                                     | 1.07                         | 0.87,1.32 | 0.82,1.40 | 0.53     | 1.15                   | 1.02,1.29 | 0.99,1.33 | 0.02     |
| 3-day average                             | 1.05                         | 0.85,1.30 | 0.80,1.38 | 0.64     | 1.09                   | 0.96,1.24 | 0.93,1.29 | 0.18     |
| 7-day average                             | 0.96                         | 0.72,1.28 | 0.66,1.39 | 0.78     | 1.06                   | 0.91,1.24 | 0.88,1.29 | 0.42     |
| <b>Cardiac Dysrhythmia and Arrhythmia</b> |                              |           |           |          |                        |           |           |          |
| Lag 0                                     | 0.58                         | 0.29,1.16 | 0.24,1.40 | 0.12     | 0.91                   | 0.63,1.31 | 0.57,1.45 | 0.62     |
| Lag 1                                     | 0.68                         | 0.46,1.01 | 0.41,1.13 | 0.06     | 0.73                   | 0.40,1.32 | 0.34,1.55 | 0.30     |
| 3-day average                             | 0.57                         | 0.33,0.99 | 0.28,1.16 | 0.05     | 0.90                   | 0.61,1.34 | 0.55,1.49 | 0.62     |
| 7-day average                             | 0.46                         | 0.22,0.93 | 0.18,1.14 | 0.03     | 0.89                   | 0.58,1.35 | 0.52,1.51 | 0.58     |



**Table S8: Cause Specific Models: Males Age 65-74 Years**

| Index Heart Condition                     | Hazard Ratio for Readmission | 95% CI    | 98.75% CI | Pr>ChiSq |
|-------------------------------------------|------------------------------|-----------|-----------|----------|
| <b>Any Heart Condition</b>                |                              |           |           |          |
| Lag 0                                     | 1.06                         | 0.95,1.18 | 0.93,1.21 | 0.28     |
| Lag 1                                     | 1.11                         | 1.00,1.22 | 0.97,1.26 | 0.06     |
| 3-day average                             | 1.08                         | 0.97,1.20 | 0.94,1.24 | 0.16     |
| 7-day average                             | 1.08                         | 0.94,1.22 | 0.91,1.26 | 0.28     |
| <b>Ischemic Heart Disease</b>             |                              |           |           |          |
| Lag 0                                     | 1.06                         | 0.94,1.20 | 0.91,1.24 | 0.35     |
| Lag 1                                     | 1.05                         | 0.92,1.20 | 0.89,1.25 | 0.47     |
| 3-day average                             | 1.04                         | 0.91,1.20 | 0.88,1.24 | 0.54     |
| 7-day average                             | 1.04                         | 0.88,1.23 | 0.85,1.28 | 0.62     |
| <b>Myocardial Infarction</b>              |                              |           |           |          |
| Lag 0                                     | 1.00                         | 0.81,1.24 | 0.77,1.31 | 0.97     |
| Lag 1                                     | 1.12                         | 0.94,1.33 | 0.89,1.40 | 0.22     |
| 3-day average                             | 1.11                         | 0.92,1.34 | 0.87,1.42 | 0.29     |
| 7-day average                             | 1.14                         | 0.90,1.44 | 0.84,1.53 | 0.29     |
| <b>Heart Failure</b>                      |                              |           |           |          |
| Lag 0                                     | 1.23                         | 1.07,1.42 | 1.03,1.47 | <0.01    |
| Lag 1                                     | 1.34                         | 1.16,1.55 | 1.12,1.61 | <0.001   |
| 3-day average                             | 1.27                         | 1.07,1.50 | 1.02,1.57 | <0.01    |
| 7-day average                             | 1.20                         | 0.97,1.49 | 0.92,1.58 | 0.09     |
| <b>Cardiac Dysrhythmia and Arrhythmia</b> |                              |           |           |          |
| Lag 0                                     | 0.87                         | 0.56,1.35 | 0.50,1.53 | 0.54     |
| Lag 1                                     | 1.05                         | 0.81,1.37 | 0.75,1.47 | 0.71     |
| 3-day average                             | 0.96                         | 0.70,1.32 | 0.64,1.45 | 0.81     |
| 7-day average                             | 1.02                         | 0.73,1.41 | 0.67,1.54 | 0.93     |

**Table S9: Cause Specific Models: Males Age 75-84 Years**

| Index Heart Condition                     | Hazard Ratio for Readmission | 95% CI    | 98.75% CI | Pr>ChiSq |
|-------------------------------------------|------------------------------|-----------|-----------|----------|
| <b>Any Heart Condition</b>                |                              |           |           |          |
| Lag 0                                     | 1.05                         | 0.95,1.15 | 0.92,1.19 | 0.36     |
| Lag 1                                     | 1.05                         | 0.95,1.16 | 0.92,1.19 | 0.39     |
| 3-day average                             | 1.04                         | 0.94,1.15 | 0.92,1.19 | 0.41     |
| 7-day average                             | 1.03                         | 0.92,1.15 | 0.89,1.19 | 0.64     |
| <b>Ischemic Heart Disease</b>             |                              |           |           |          |
| Lag 0                                     | 1.05                         | 0.91,1.22 | 0.87,1.28 | 0.50     |
| Lag 1                                     | 1.05                         | 0.92,1.22 | 0.88,1.26 | 0.46     |
| 3-day average                             | 1.05                         | 0.90,1.22 | 0.87,1.27 | 0.53     |
| 7-day average                             | 1.05                         | 0.90,1.24 | 0.86,1.29 | 0.52     |
| <b>Myocardial Infarction</b>              |                              |           |           |          |
| Lag 0                                     | 1.07                         | 0.83,1.38 | 0.77,1.48 | 0.61     |
| Lag 1                                     | 1.01                         | 0.80,1.27 | 0.76,1.35 | 0.92     |
| 3-day average                             | 1.06                         | 0.84,1.34 | 0.79,1.42 | 0.62     |
| 7-day average                             | 1.06                         | 0.85,1.33 | 0.80,1.42 | 0.60     |
| <b>Heart Failure</b>                      |                              |           |           |          |
| Lag 0                                     | 1.10                         | 0.96,1.25 | 0.93,1.30 | 0.16     |
| Lag 1                                     | 1.06                         | 0.92,1.24 | 0.88,1.29 | 0.42     |
| 3-day average                             | 1.08                         | 0.94,1.25 | 0.91,1.29 | 0.27     |
| 7-day average                             | 1.05                         | 0.89,1.23 | 0.85,1.29 | 0.56     |
| <b>Cardiac Dysrhythmia and Arrhythmia</b> |                              |           |           |          |
| Lag 0                                     | 0.98                         | 0.74,1.30 | 0.69,1.41 | 0.91     |
| Lag 1                                     | 0.95                         | 0.71,1.25 | 0.66,1.35 | 0.70     |
| 3-day average                             | 0.95                         | 0.71,1.28 | 0.66,1.38 | 0.75     |
| 7-day average                             | 0.92                         | 0.62,1.36 | 0.55,1.52 | 0.67     |

**Table S10: Cause Specific Models :Males Age 75-84 Years**

| Index Heart Condition                     | Hazard Ratio for Readmission | 95% CI    | 98.75% CI | Pr>ChiSq |
|-------------------------------------------|------------------------------|-----------|-----------|----------|
| <b>Any Heart Condition</b>                |                              |           |           |          |
| Lag 0                                     | 0.97                         | 0.85,1.12 | 0.81,1.16 | 0.69     |
| Lag 1                                     | 1.05                         | 0.93,1.20 | 0.90,1.24 | 0.43     |
| 3-day average                             | 1.06                         | 0.93,1.21 | 0.90,1.26 | 0.36     |
| 7-day average                             | 1.08                         | 0.93,1.25 | 0.89,1.30 | 0.32     |
| <b>Ischemic Heart Disease</b>             |                              |           |           |          |
| Lag 0                                     | 1.07                         | 0.88,1.31 | 0.83,1.39 | 0.49     |
| Lag 1                                     | 1.05                         | 0.86,1.28 | 0.82,1.36 | 0.62     |
| 3-day average                             | 1.17                         | 0.97,1.42 | 0.93,1.49 | 0.09     |
| 7-day average                             | 1.22                         | 1.00,1.48 | 0.95,1.57 | 0.05     |
| <b>Myocardial Infarction</b>              |                              |           |           |          |
| Lag 0                                     | 1.08                         | 0.80,1.45 | 0.74,1.57 | 0.63     |
| Lag 1                                     | 0.99                         | 0.70,1.40 | 0.64,1.53 | 0.96     |
| 3-day average                             | 1.19                         | 0.90,1.58 | 0.83,1.71 | 0.22     |
| 7-day average                             | 1.19                         | 0.86,1.64 | 0.79,1.79 | 0.30     |
| <b>Heart Failure</b>                      |                              |           |           |          |
| Lag 0                                     | 0.88                         | 0.71,1.09 | 0.67,1.16 | 0.25     |
| Lag 1                                     | 1.06                         | 0.88,1.29 | 0.83,1.36 | 0.54     |
| 3-day average                             | 0.94                         | 0.76,1.17 | 0.72,1.24 | 0.59     |
| 7-day average                             | 0.88                         | 0.67,1.15 | 0.63,1.23 | 0.34     |
| <b>Cardiac Dysrhythmia and Arrhythmia</b> |                              |           |           |          |
| Lag 0                                     | 0.79                         | 0.51,1.22 | 0.45,1.38 | 0.28     |
| Lag 1                                     | 1.01                         | 0.76,1.35 | 0.70,1.46 | 0.93     |
| 3-day average                             | 0.99                         | 0.71,1.36 | 0.65,1.49 | 0.93     |
| 7-day average                             | 1.08                         | 0.80,1.46 | 0.73,1.58 | 0.63     |

**Table S11: Cause Specific Models: Females Age 65-74 Years**

| Index Heart Condition                     | Hazard Ratio for Readmission | 95% CI    | 98.75% CI | Pr>ChiSq |
|-------------------------------------------|------------------------------|-----------|-----------|----------|
| <b>Any Heart Condition</b>                |                              |           |           |          |
| Lag 0                                     | 1.04                         | 0.92,1.18 | 0.89,1.22 | 0.50     |
| Lag 1                                     | 1.03                         | 0.92,1.16 | 0.89,1.20 | 0.59     |
| 3-day average                             | 1.02                         | 0.91,1.16 | 0.88,1.20 | 0.70     |
| 7-day average                             | 1.01                         | 0.87,1.17 | 0.83,1.22 | 0.91     |
| <b>Ischemic Heart Disease</b>             |                              |           |           |          |
| Lag 0                                     | 1.03                         | 0.82,1.28 | 0.78,1.36 | 0.80     |
| Lag 1                                     | 1.02                         | 0.82,1.27 | 0.77,1.35 | 0.85     |
| 3-day average                             | 1.05                         | 0.85,1.29 | 0.80,1.36 | 0.67     |
| 7-day average                             | 1.08                         | 0.86,1.36 | 0.80,1.45 | 0.53     |
| <b>Myocardial Infarction</b>              |                              |           |           |          |
| Lag 0                                     | 0.92                         | 0.62,1.36 | 0.55,1.52 | 0.67     |
| Lag 1                                     | 0.75                         | 0.49,1.16 | 0.43,1.30 | 0.19     |
| 3-day average                             | 1.04                         | 0.78,1.38 | 0.72,1.49 | 0.81     |
| 7-day average                             | 1.16                         | 0.88,1.54 | 0.82,1.66 | 0.29     |
| <b>Heart Failure</b>                      |                              |           |           |          |
| Lag 0                                     | 0.92                         | 0.70,1.20 | 0.65,1.29 | 0.56     |
| Lag 1                                     | 1.02                         | 0.85,1.22 | 0.81,1.28 | 0.86     |
| 3-day average                             | 0.96                         | 0.78,1.19 | 0.73,1.26 | 0.72     |
| 7-day average                             | 0.95                         | 0.74,1.23 | 0.69,1.32 | 0.71     |
| <b>Cardiac Dysrhythmia and Arrhythmia</b> |                              |           |           |          |
| Lag 0                                     | 1.17                         | 0.96,1.41 | 0.91,1.49 | 0.13     |
| Lag 1                                     | 1.04                         | 0.84,1.29 | 0.79,1.37 | 0.71     |
| 3-day average                             | 1.03                         | 0.80,1.32 | 0.75,1.41 | 0.84     |
| 7-day average                             | 0.91                         | 0.67,1.24 | 0.62,1.35 | 0.56     |

**Table S12: Cause Specific Models: Females Age 75-84 Years**

| Index Heart Condition                     | Hazard Ratio for Readmission | 95% CI    | 98.75% CI | Pr>ChiSq |
|-------------------------------------------|------------------------------|-----------|-----------|----------|
| <b>Any Heart Condition</b>                |                              |           |           |          |
| Lag 0                                     | 0.91                         | 0.79,1.05 | 0.76,1.09 | 0.19     |
| Lag 1                                     | 1.02                         | 0.90,1.16 | 0.87,1.20 | 0.72     |
| 3-day average                             | 0.95                         | 0.83,1.08 | 0.80,1.12 | 0.44     |
| 7-day average                             | 1.01                         | 0.88,1.15 | 0.85,1.20 | 0.89     |
| <b>Ischemic Heart Disease</b>             |                              |           |           |          |
| Lag 0                                     | 0.73                         | 0.55,0.97 | 0.51,1.05 | 0.03     |
| Lag 1                                     | 0.73                         | 0.56,0.95 | 0.52,1.02 | 0.02     |
| 3-day average                             | 0.71                         | 0.56,0.92 | 0.52,0.98 | 0.01     |
| 7-day average                             | 0.86                         | 0.66,1.12 | 0.61,1.20 | 0.26     |
| <b>Myocardial Infarction</b>              |                              |           |           |          |
| Lag 0                                     | 1.07                         | 0.64,0.41 | 0.36,1.15 | 0.06     |
| Lag 1                                     | 1.01                         | 0.64,0.41 | 0.37,1.14 | 0.05     |
| 3-day average                             | 1.06                         | 0.62,0.41 | 0.36,1.06 | 0.03     |
| 7-day average                             | 1.06                         | 0.59,0.39 | 0.35,1.02 | 0.02     |
| <b>Heart Failure</b>                      |                              |           |           |          |
| Lag 0                                     | 1.15                         | 0.98,1.35 | 0.93,1.41 | 0.09     |
| Lag 1                                     | 1.33                         | 1.16,1.53 | 1.12,1.58 | <0.001   |
| 3-day average                             | 1.25                         | 1.08,1.44 | 1.04,1.50 | <0.01    |
| 7-day average                             | 1.28                         | 1.08,1.50 | 1.04,1.57 | <0.01    |
| <b>Cardiac Dysrhythmia and Arrhythmia</b> |                              |           |           |          |
| Lag 0                                     | 0.63                         | 0.43,0.92 | 0.38,1.03 | 0.02     |
| Lag 1                                     | 0.78                         | 0.54,1.13 | 0.49,1.25 | 0.19     |
| 3-day average                             | 0.66                         | 0.43,1.00 | 0.39,1.12 | 0.05     |
| 7-day average                             | 0.74                         | 0.51,1.08 | 0.46,1.19 | 0.17     |

**Table S13: Cause Specific Models: Females Age 85+ Years**

| Index Heart Condition                     | Hazard Ratio for Readmission | 95% CI    | 98.75% CI | Pr>ChiSq |
|-------------------------------------------|------------------------------|-----------|-----------|----------|
| <b>Any Heart Condition</b>                |                              |           |           |          |
| Lag 0                                     | 1.03                         | 0.89,1.19 | 0.86,1.24 | 0.69     |
| Lag 1                                     | 1.03                         | 0.89,1.20 | 0.86,1.24 | 0.66     |
| 3-day average                             | 0.99                         | 0.83,1.19 | 0.79,1.25 | 0.94     |
| 7-day average                             | 0.93                         | 0.74,1.17 | 0.69,1.24 | 0.53     |
| <b>Ischemic Heart Disease</b>             |                              |           |           |          |
| Lag 0                                     | 1.11                         | 0.96,1.29 | 0.92,1.35 | 0.17     |
| Lag 1                                     | 1.14                         | 0.98,1.32 | 0.94,1.37 | 0.08     |
| 3-day average                             | 1.10                         | 0.92,1.30 | 0.88,1.37 | 0.31     |
| 7-day average                             | 1.09                         | 0.88,1.36 | 0.82,1.44 | 0.44     |
| <b>Myocardial Infarction</b>              |                              |           |           |          |
| Lag 0                                     | 1.07                         | 0.82,1.38 | 0.77,1.48 | 0.63     |
| Lag 1                                     | 1.09                         | 0.84,1.42 | 0.78,1.52 | 0.50     |
| 3-day average                             | 1.05                         | 0.79,1.41 | 0.73,1.53 | 0.72     |
| 7-day average                             | 1.02                         | 0.72,1.44 | 0.66,1.59 | 0.91     |
| <b>Heart Failure</b>                      |                              |           |           |          |
| Lag 0                                     | 1.07                         | 0.88,1.30 | 0.83,1.37 | 0.49     |
| Lag 1                                     | 1.06                         | 0.85,1.32 | 0.80,1.40 | 0.60     |
| 3-day average                             | 1.03                         | 0.83,1.28 | 0.78,1.36 | 0.79     |
| 7-day average                             | 0.92                         | 0.68,1.25 | 0.62,1.36 | 0.60     |
| <b>Cardiac Dysrhythmia and Arrhythmia</b> |                              |           |           |          |
| Lag 0                                     | 0.60                         | 0.30,1.20 | 0.25,1.46 | 0.15     |
| Lag 1                                     | 0.70                         | 0.48,1.03 | 0.43,1.15 | 0.07     |
| 3-day average                             | 0.58                         | 0.33,1.02 | 0.28,1.19 | 0.06     |
| 7-day average                             | 0.45                         | 0.21,0.96 | 0.17,1.18 | 0.04     |

**Table S14: Cohort**

| Index Heart Condition                     | Hazard Ratio<br>for Readmission | 95% CI    | 98.75% CI | Pr>ChiSq | Hazard Ratio<br>for Death | 95% CI    | 98.75% CI | Pr>ChiSq |
|-------------------------------------------|---------------------------------|-----------|-----------|----------|---------------------------|-----------|-----------|----------|
| <b>Any Heart Condition</b>                |                                 |           |           |          |                           |           |           |          |
| Lag 0                                     | 1.02                            | 0.96,1.07 | 0.95,1.09 | 0.54     | 1.05                      | 1.00,1.11 | 0.99,1.13 | 0.05     |
| Lag 1                                     | 1.05                            | 1.00,1.11 | 0.99,1.12 | 0.05     | 1.06                      | 1.01,1.12 | 0.99,1.13 | 0.02     |
| 3-day average                             | 1.03                            | 0.97,1.08 | 0.96,1.10 | 0.33     | 1.04                      | 0.99,1.10 | 0.97,1.12 | 0.14     |
| 7-day average                             | 1.02                            | 0.96,1.09 | 0.95,1.10 | 0.47     | 1.04                      | 0.98,1.11 | 0.96,1.13 | 0.22     |
| <b>Ischemic Heart Disease</b>             |                                 |           |           |          |                           |           |           |          |
| Lag 0                                     | 1.03                            | 0.96,1.12 | 0.94,1.14 | 0.40     | 1.08                      | 0.98,1.19 | 0.96,1.23 | 0.11     |
| Lag 1                                     | 1.03                            | 0.95,1.11 | 0.93,1.13 | 0.49     | 1.07                      | 0.97,1.18 | 0.94,1.22 | 0.18     |
| 3-day average                             | 1.03                            | 0.96,1.12 | 0.93,1.14 | 0.42     | 1.05                      | 0.95,1.17 | 0.92,1.20 | 0.32     |
| 7-day average                             | 1.05                            | 0.97,1.15 | 0.94,1.17 | 0.24     | 1.10                      | 0.98,1.23 | 0.95,1.27 | 0.10     |
| <b>Myocardial Infarction</b>              |                                 |           |           |          |                           |           |           |          |
| Lag 0                                     | 0.99                            | 0.87,1.11 | 0.85,1.15 | 0.81     | 1.02                      | 0.91,1.15 | 0.88,1.19 | 0.73     |
| Lag 1                                     | 0.98                            | 0.88,1.10 | 0.85,1.14 | 0.76     | 1.00                      | 0.88,1.13 | 0.85,1.17 | 0.96     |
| 3-day average                             | 1.03                            | 0.92,1.16 | 0.90,1.19 | 0.56     | 1.02                      | 0.90,1.15 | 0.87,1.19 | 0.80     |
| 7-day average                             | 1.04                            | 0.92,1.18 | 0.89,1.22 | 0.52     | 1.08                      | 0.95,1.23 | 0.92,1.28 | 0.23     |
| <b>Heart Failure</b>                      |                                 |           |           |          |                           |           |           |          |
| Lag 0                                     | 1.08                            | 1.01,1.16 | 0.99,1.19 | 0.03     | 1.06                      | 0.99,1.13 | 0.97,1.16 | 0.11     |
| Lag 1                                     | 1.16                            | 1.08,1.24 | 1.06,1.26 | <0.0001  | 1.10                      | 1.03,1.17 | 1.01,1.19 | <0.01    |
| 3-day average                             | 1.10                            | 1.03,1.19 | 1.01,1.21 | 0.01     | 1.07                      | 1.00,1.15 | 0.98,1.17 | 0.06     |
| 7-day average                             | 1.07                            | 0.99,1.17 | 0.96,1.20 | 0.1      | 1.05                      | 0.97,1.14 | 0.95,1.17 | 0.21     |
| <b>Cardiac Dysrhythmia and Arrhythmia</b> |                                 |           |           |          |                           |           |           |          |
| Lag 0                                     | 0.86                            | 0.74,1.01 | 0.71,1.06 | 0.07     | 0.99                      | 0.85,1.15 | 0.82,1.20 | 0.92     |
| Lag 1                                     | 0.94                            | 0.82,1.07 | 0.79,1.11 | 0.32     | 0.79                      | 0.65,0.96 | 0.62,1.02 | 0.02     |
| 3-day average                             | 0.88                            | 0.75,1.02 | 0.72,1.06 | 0.08     | 0.89                      | 0.75,1.05 | 0.71,1.10 | 0.17     |
| 7-day average                             | 0.87                            | 0.74,1.03 | 0.70,1.08 | 0.11     | 0.91                      | 0.74,1.12 | 0.69,1.18 | 0.36     |
